# Supplementary material
Source: publisher figshare collection journal article supplement (https://sage.figshare.com/ndownloader/files/17417621)
Supplement: Supplementary file 1 [file 17417621]

---

## APPENDIX

### *Measurement of trust in top management (3 items)*

1. Top managers trust employees in our agency.
2. We trust the top management in our agency.
3. In our agency, the top managers take responsibility for employees' lives.

### *Measurement of performance-driven culture (2 items)*

1. In our agency, employees are encouraged to continuously improve performance.
2. In our agency, employees are rewarded for excellent performance.

### *Measurement of ethics-driven culture (3 items)*

1. In our agency, someone misused confidential information (reverse coding).
2. Our agency sometimes acquires the budget inappropriately from above and/or outside the organization (reverse coding).
3. In our agency, someone took credit for another's work performance (reverse coding).

### *Measurement of rational public service motivation (3 items)*

1. In essence, I have a negative perception of politics (reverse coding).
2. The compromises that are involved in public policymaking don't appeal to me (reverse coding).
3. I don't care much for politicians (reverse coding).

### *Measurement of norm-based public service motivation (3 items)*

1. I unselfishly contribute to my community.
2. Meaningful public service is very important to me.
3. I consider public service my civic duty.

### *Measurement of affective public service motivation (5 items)*

1. Making a difference in society means more to me than personal achievements.
  2. I believe in putting duty before self.
  3. Much of what I do is for a cause bigger than myself.
  4. Most social programs are too vital to do without.
  5. To me, patriotism includes seeing to the welfare of others.
-
